# Supplementary material for: Prevalence of Mycoplasma bovis in Algeria and Characterisation of the Isolated Clones
Source: PubMed Central journal article supplement (PMC9163989; doi:10.3389/fvets.2022.910799), 2022-05-20
Supplement: Image_1.pdf [file Image_1.pdf]

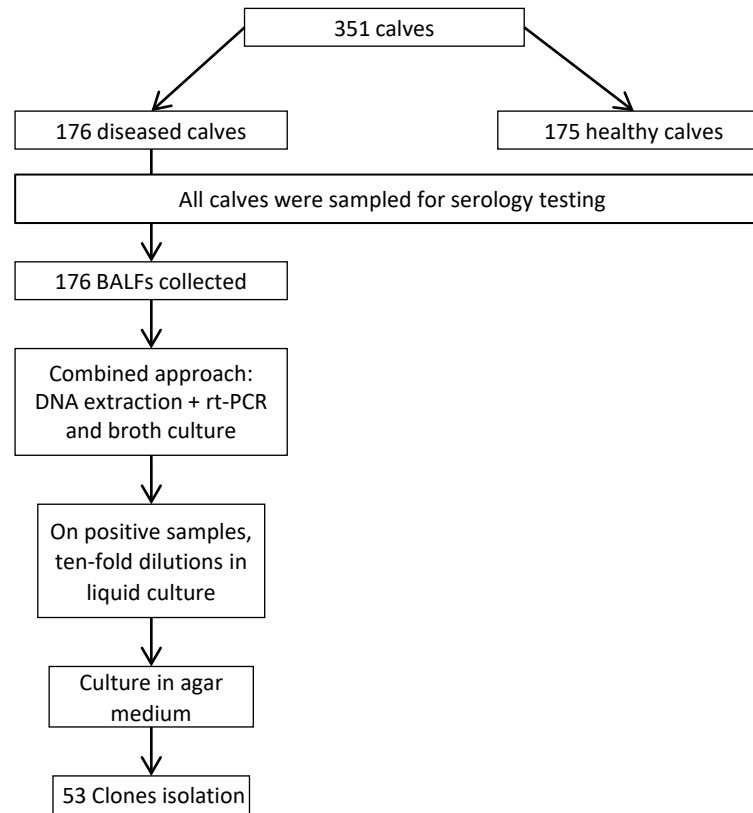

Supplementary Figure 1. Samples processing
